# Supplementary material for: Dumbbell-PCR: a method to quantify specific small RNA variants with a single nucleotide resolution at terminal sequences
Source: PubMed Central journal article supplement — Nucleic Acids Res. 2015 Mar 16;43(12):e77. doi: 10.1093/nar/gkv218 (PMC4499115; doi:10.1093/nar/gkv218), 2015-03-16
Supplement: supp_gkv218_nar-03557-met-g-2014-File007.pdf [file supp_gkv218_nar-03557-met-g-2014-File007.pdf]

## Supplementary information

### **Fig. S1. Standard RT-PCR using stem-loop primer is not capable of distinguishing 3'-variants of miRNA**

(A) Schematic representation of a standard RT-PCR using a stem-loop RT primer for miRNA quantification (37). A stem-loop RT primer was specifically hybridized to the 3'-end of the target RNA, followed by reverse transcription. The resultant cDNA was amplified and quantified by Real-time PCR using forward and reverse primers derived from the targeted miRNA and RT primer, respectively.

(B) The standard RT-PCR was designed to target miR-16, which was applied for the detection of synthetic miR-16 and its 3'-variants whose sequences are shown above the graph. The method was performed as previously reported (37) with minor modifications. For reverse transcription, synthetic miR-16 or its 3'-variants (200 amol) was incubated in the reaction mixture (20  $\mu$ L volume) containing SuperScript III Reverse Transcriptase (Life Technologies) and 1 pmol of stem-loop RT primer (5'-GTCGTATCCAGTGCAGGGTCCGAGGTATTCGCACTGGATACGACCGCCAA-3') at 16°C for 30 min, followed by incubation at 42°C for 30 min. The resultant cDNA solution was diluted to 1:5, and 1.5  $\mu$ L of this solution was used for the Real-time PCR reaction (10  $\mu$ L volume) using SsoFast EvaGreen Supermix (BioRad) and StepOne Plus Real-time PCR machine (Applied Biosystems). The miR-16 and its 3'-variants were similarly detected by the method, indicating that the method does not have a resolution to distinguish target RNA from its 3'-variants.

### **Fig. S2. Schematic representation of the quantification of miR-16 by 3'-Db-PCR**

**Fig. S3. 5'-Db-PCR, 3'-Db-PCR, and Db-PCR amplified cDNAs as a clear band**

The amplified cDNAs resulting from 5'-Db-PCR (5'-Db), 3'-Db-PCR (3'-Db), and Db-PCR (Db) for detection of miR-16 and miR-21 in HeLa total RNA were developed by 3% Metaphor gel electrophoresis (LONZA). The expected band sizes from the 5'-Db-PCR, 3'-Db-PCR, and Db-PCR are 59, 49, and 66 bp, respectively; a clear band with the expected size was observed in all lanes.

**Fig. S4. Proportional correlation of miR-16 input to the Ct value obtained by 3'-Db-PCR, 5'-Db-PCR, and Db-PCR**

Synthetic miR-16 (0.0156, 0.0625, 0.125, 0.25, and 1 fmol) were quantified by 3'-Db-PCR, 5'-Db-PCR, and Db-PCR. Each data set represents the average of three independent experiments with bars showing the SD.

**Fig. S5. Sequences and secondary structures of the 3'-Db-adaptor and targeted *Bombyx* piRNAs quantified by 3'-Db-PCR****Fig. S6. Schematic representation of the quantification of miR-16 by 5'-Db-PCR****Fig. S7. Sequences and secondary structures of the 5'-Db-adaptor and targeted human microRNAs quantified by 5'-Db-PCR****Fig. S8. Schematic representation of the quantification of miR-16 by Db-PCR**

**Fig. S9. Sequences and secondary structures of the adapters and targeted small RNAs quantified by Db-PCR**

**Supplementary Table S1. Sequences of adaptors and primers for 3'-Db-PCR**

| Target              | Primer/adaptor | Sequence (5'-3')                               |
|---------------------|----------------|------------------------------------------------|
| miR-16              | 3'-Db-adaptor  | /5Phos/CTCAGTGCAGGGTCCGAGGTATTTCGCACTGAGCGCCAA |
|                     | RT primer      | CTCAGTGCGAATACCTCGGACCCT                       |
|                     | Reverse primer | CGAATACCTCGGACC                                |
|                     | Forward primer | GCGCTAGCAGCACGTAAATAT                          |
|                     | TaqMan probe   | /56-FAM/TGGCGCTCA/ZEN/GTG/3IABkFQ/             |
| piR-1               | 3'-Db-adaptor  | /5Phos/CTCAGTGCAGGGTCCGAGGTATTTCGCACTGAGGTTCGA |
|                     | RT primer      | CTCAGTGCGAATACCTCGGACCCT                       |
|                     | Reverse primer | CGAATACCTCGGACC                                |
|                     | Forward primer | TCAAAAATAACGGATTG                              |
|                     | TaqMan probe   | /56-FAM/TCGAACCTC/ZEN/AGTGCAG/3IABkFQ/         |
| piR-1-<br>[3'+AGUC] | 3'-Db-adaptor  | /5Phos/CTCAGTGCAGGGTCCGAGGTATTTCGCACTGAGGACTGT |
|                     | RT primer      | CTCAGTGCGAATACCTCGGACCCT                       |
|                     | Reverse primer | CGAATACCTCGGACC                                |
|                     | Forward primer | TCAAAAATAACGGATTG                              |
|                     | TaqMan probe   | /56-FAM/AACAGTCCT/ZEN/CAGTGCAG/3IABkFQ/        |
| piR-2               | 3'-Db-adaptor  | /5Phos/CTCAGTGCAGGGTCCGAGGTATTTCGCACTGAGCCGCAG |
|                     | RT primer      | CTCAGTGCGAATACCTCGGACCCT                       |
|                     | Reverse primer | CGAATACCTCGGACC                                |
|                     | Forward primer | AAAAGCATGAGAATTTGC                             |
|                     | TaqMan probe   | /56-FAM/CTGCGGCTC/ZEN/AGTGCA/3IABkFQ/          |
| piR-2-<br>[3'+ACCA] | 3'-Db-adaptor  | /5Phos/CTCAGTGCAGGGTCCGAGGTATTTCGCACTGAGTGGTCC |
|                     | RT primer      | CTCAGTGCGAATACCTCGGACCCT                       |
|                     | Reverse primer | CGAATACCTCGGACC                                |
|                     | Forward primer | AAAAGCATGAGAATTTGC                             |
|                     | TaqMan probe   | /56-FAM/CGGACCACT/ZEN/CAGTGCAG/3IABkFQ/        |

**Supplementary Table S2. Sequences of adaptors and primers for 5'-Db-PCR**

| Target             | Primer/adaptor | Sequence (5'-3')                                          |
|--------------------|----------------|-----------------------------------------------------------|
| miR-16             | 5'-Db-adaptor  | CTGCTACTCAGTGCGTGGGAGGGTGTGTGGTCTTGCTTGGTGTGCA<br>CTGrArG |
|                    | RT primer      | GCGACGCCAATATTTACGTG                                      |
|                    | Reverse primer | GCGACGCCAATATTTACGTG                                      |
|                    | Forward primer | GAGGGTGTGTGGTCTT                                          |
|                    | TaqMan probe   | /56-FAM/TGTGCACTG/ZEN/AGTAGCAG/3IABkFQ/                   |
| miR-26a            | 5'-Db-adaptor  | CTTGAACTCAGTGCGTGGGAGGGTGTGTGGTCTTGCTTGGTGTGCA<br>CTGrArG |
|                    | RT primer      | CAGCCTATCCTGGATTA                                         |
|                    | Reverse primer | CAGCCTATCCTGGATTA                                         |
|                    | Forward primer | GAGGGTGTGTGGTCTT                                          |
|                    | TaqMan probe   | /56-FAM/TGTGCACTG/ZEN/AGTTCAAG/3IABkFQ/                   |
| miR-26a-<br>[5'+A] | 5'-Db-adaptor  | TTGAATCTCAGTGCGTGGGAGGGTGTGTGGTCTTGCTTGGTGTGCA<br>CTGrArG |
|                    | RT primer      | CAGCCTATCCTGGATTA                                         |
|                    | Reverse primer | CAGCCTATCCTGGATTA                                         |
|                    | Forward primer | GAGGGTGTGTGGTCTT                                          |
|                    | TaqMan probe   | /56-FAM/TGTGCACTG/ZEN/AGATTCAA/3IABkFQ/                   |

A, G, C, and T designate DNA, whereas rA and rG designate RNA.

**Supplementary Table S3. Sequences of adaptors and primers for Db-PCR**

| Target              | Primer/adaptor    | Sequence (5'–3')                                 |
|---------------------|-------------------|--------------------------------------------------|
| miR-16              | 5'-Dbs-adaptor-6  | CTGCTACGTCG/idSp/TGGAGTGTGTGCTTTGArCrG           |
|                     | 5'-Dbs-adaptor-12 | TACGTGCTGCTACGTCG/idSp/TGGAGTGTGTGCTTTGArCrG     |
|                     | 5'-Dbs-adaptor-16 | TATTTACGTGCTGCTACGTCG/idSp/TGGAGTGTGTGCTTTGArCrG |
|                     | 3'-Db-adaptor     | /5Phos/CTCAGTGCAGGGTCCGAGGTATTCGCACTGAGCGCCAA    |
|                     | RT primer         | CTCAGTGCGAATACCTCGGACCCT                         |
|                     | Reverse primer    | CGAATACCTCGGACC                                  |
|                     | Forward primer    | TGGAGTGTGTGCTTTGACGTAGC                          |
|                     | TaqMan probe      | /56-FAM/AAATATTGG/ZEN/CGCTCAGTGCA/3IABkFQ/       |
| miR-21              | 5'-Dbs-adaptor    | TCAGTCTGATAAGCTACGTCG/idSp/TGGAGTGTGTGCTTTGArCrG |
|                     | 3'-Db-adaptor     | /5Phos/CTCAGTGCAGGGTCCGAGGTATTCGCACTGAGTCAACA    |
|                     | RT primer         | CTCAGTGCGAATACCTCGGACCCT                         |
|                     | Reverse primer    | CGAATACCTCGGACC                                  |
|                     | Forward primer    | TGGAGTGTGTGCTTTGACGTAGC                          |
|                     | TaqMan probe      | /56-FAM/AGACTGATG/ZEN/TTGCTCAGTGCA/3IABkFQ/      |
| piR-2               | 5'-Dbs-adaptor    | AAATTCTCATGCTTTTCGTCG/idSp/TGGAGTGTGTGCTTTGArCrG |
|                     | 3'-Db-adaptor     | /5Phos/CTCAGTGCAGGGTCCGAGGTATTCGCACTGAGCCGCAG    |
|                     | RT primer         | CTCAGTGCGAATACCTCGGACCCT                         |
|                     | Reverse primer    | CGAATACCTCGGACC                                  |
|                     | Forward primer    | TGGAGTGTGTGCTTTGACGAAAAG                         |
|                     | TaqMan probe      | /56-FAM/CTGCGGCTC/ZEN/AGTGCA/3IABkFQ/            |
| piR-2-<br>[3'+ACCA] | 5'-Dbs-adaptor    | AAATTCTCATGCTTTTCGTCG/idSp/TGGAGTGTGTGCTTTGArCrG |
|                     | 3'-Db-adaptor     | /5Phos/CTCAGTGCAGGGTCCGAGGTATTCGCACTGAGTGGTCC    |
|                     | RT primer         | CTCAGTGCGAATACCTCGGACCCT                         |
|                     | Reverse primer    | CGAATACCTCGGACC                                  |
|                     | Forward primer    | TGGAGTGTGTGCTTTGACGAAAAG                         |
|                     | TaqMan probe      | /56-FAM/CGGACCACT/ZEN/CAGTGCAG/3IABkFQ/          |

A, G, C, and T designate DNA, whereas rC and rG designate RNA. 5'-Db-adaptor-6, 5'-Db-adaptor-12, and 5'-Db-adaptor-16 designate a 5'-Db-adaptor with 6, 12 and 16 nt protruding 5'-end, respectively.

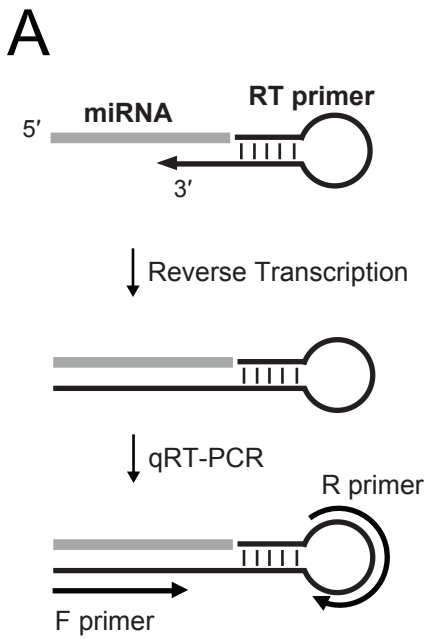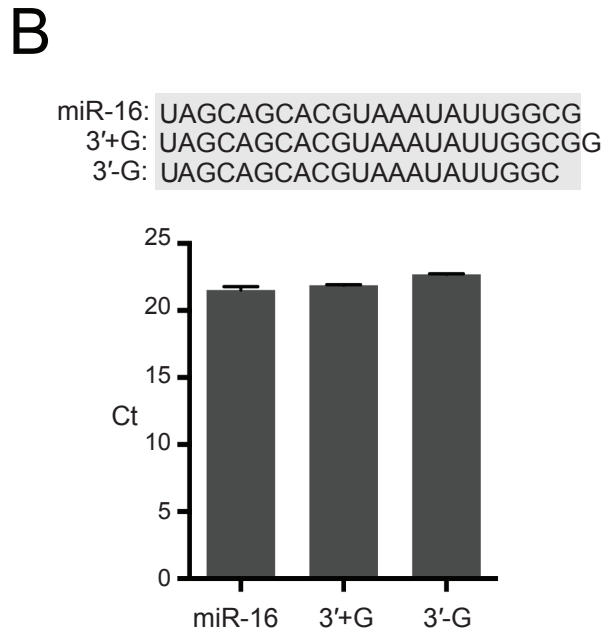

*Honda et al. Figure S1*

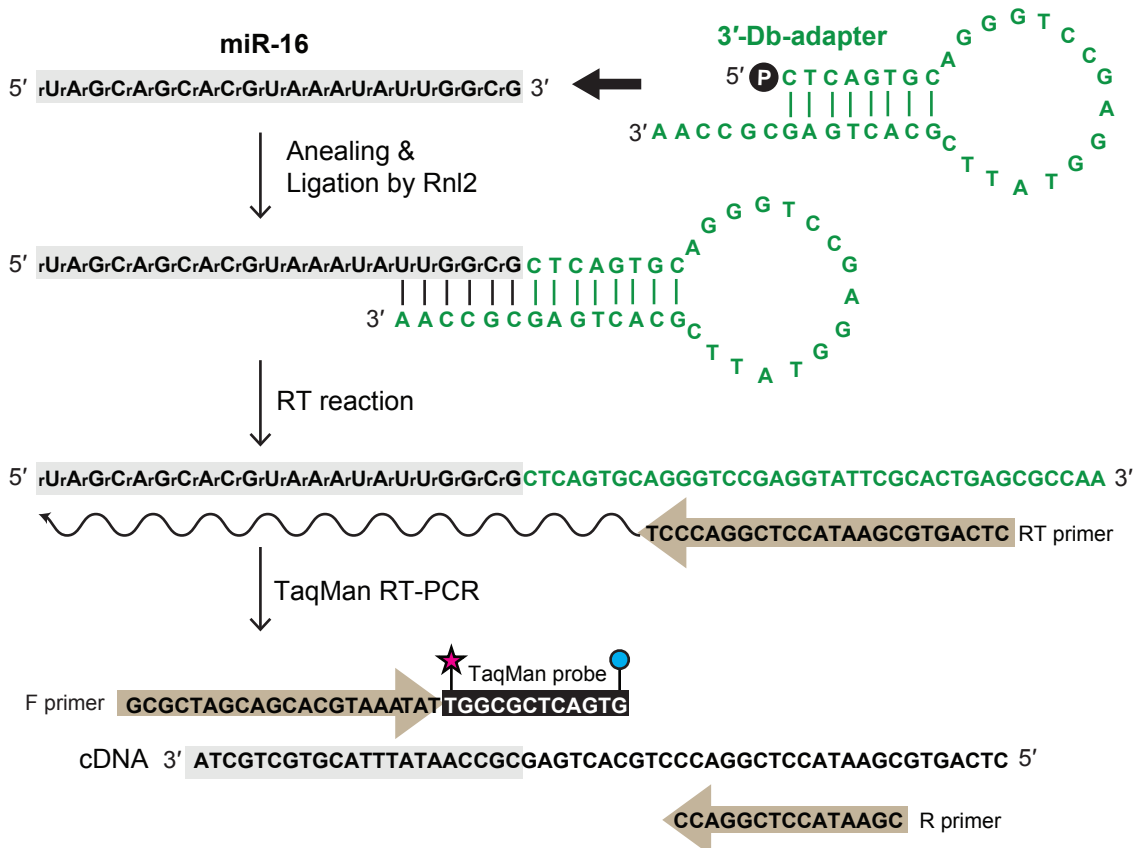

*Honda et al. Figure S2*

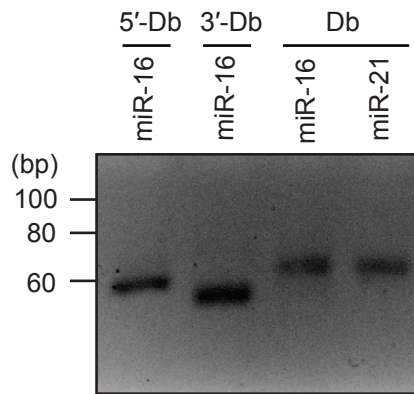

*Honda et al. Figure S3*

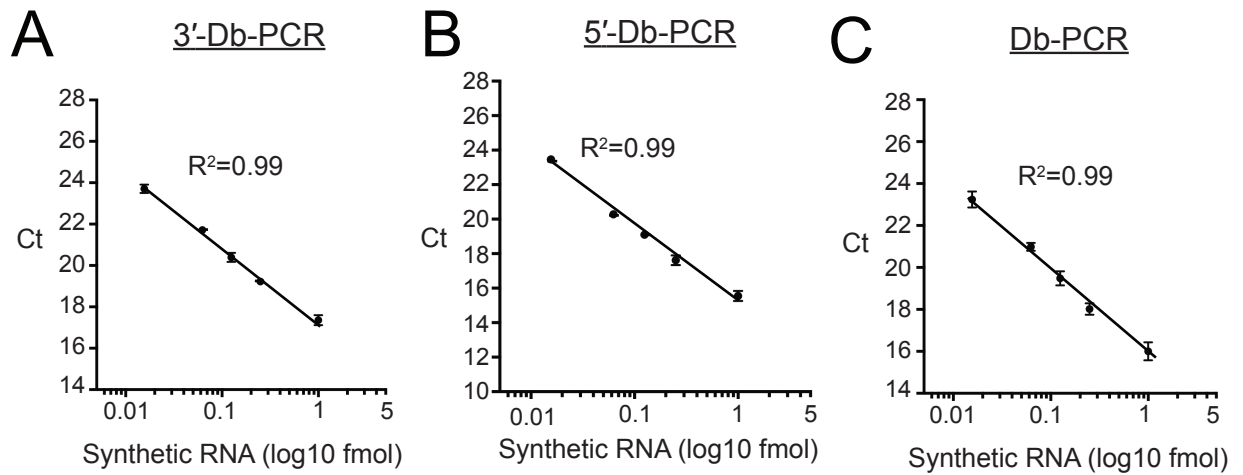

*Honda et al. Figure S4*



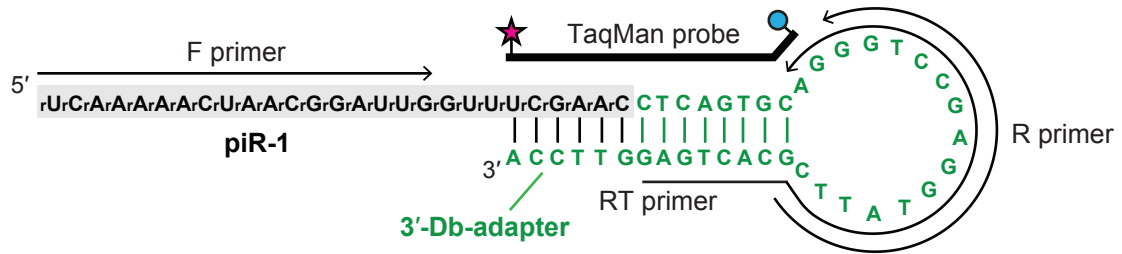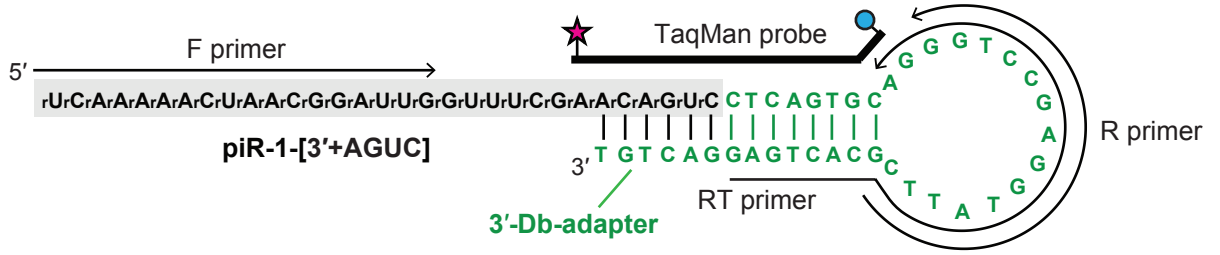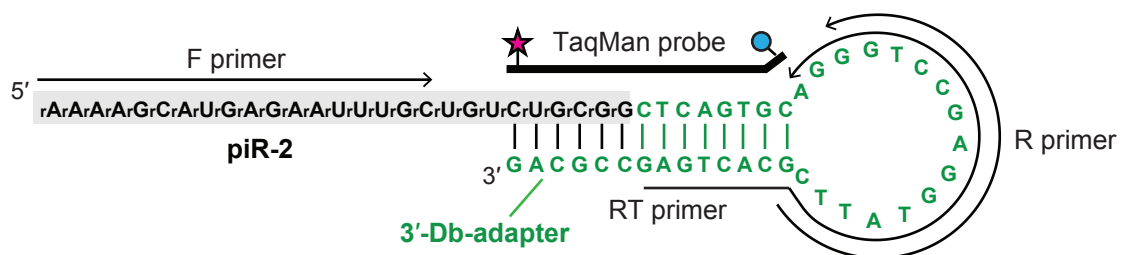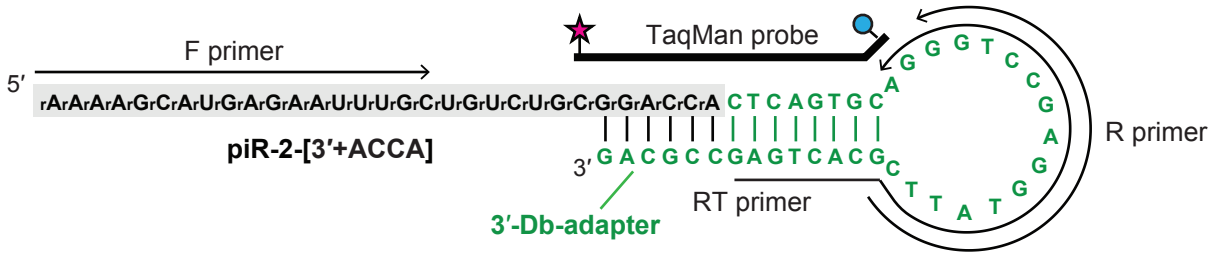

*Honda et al. Figure S5*

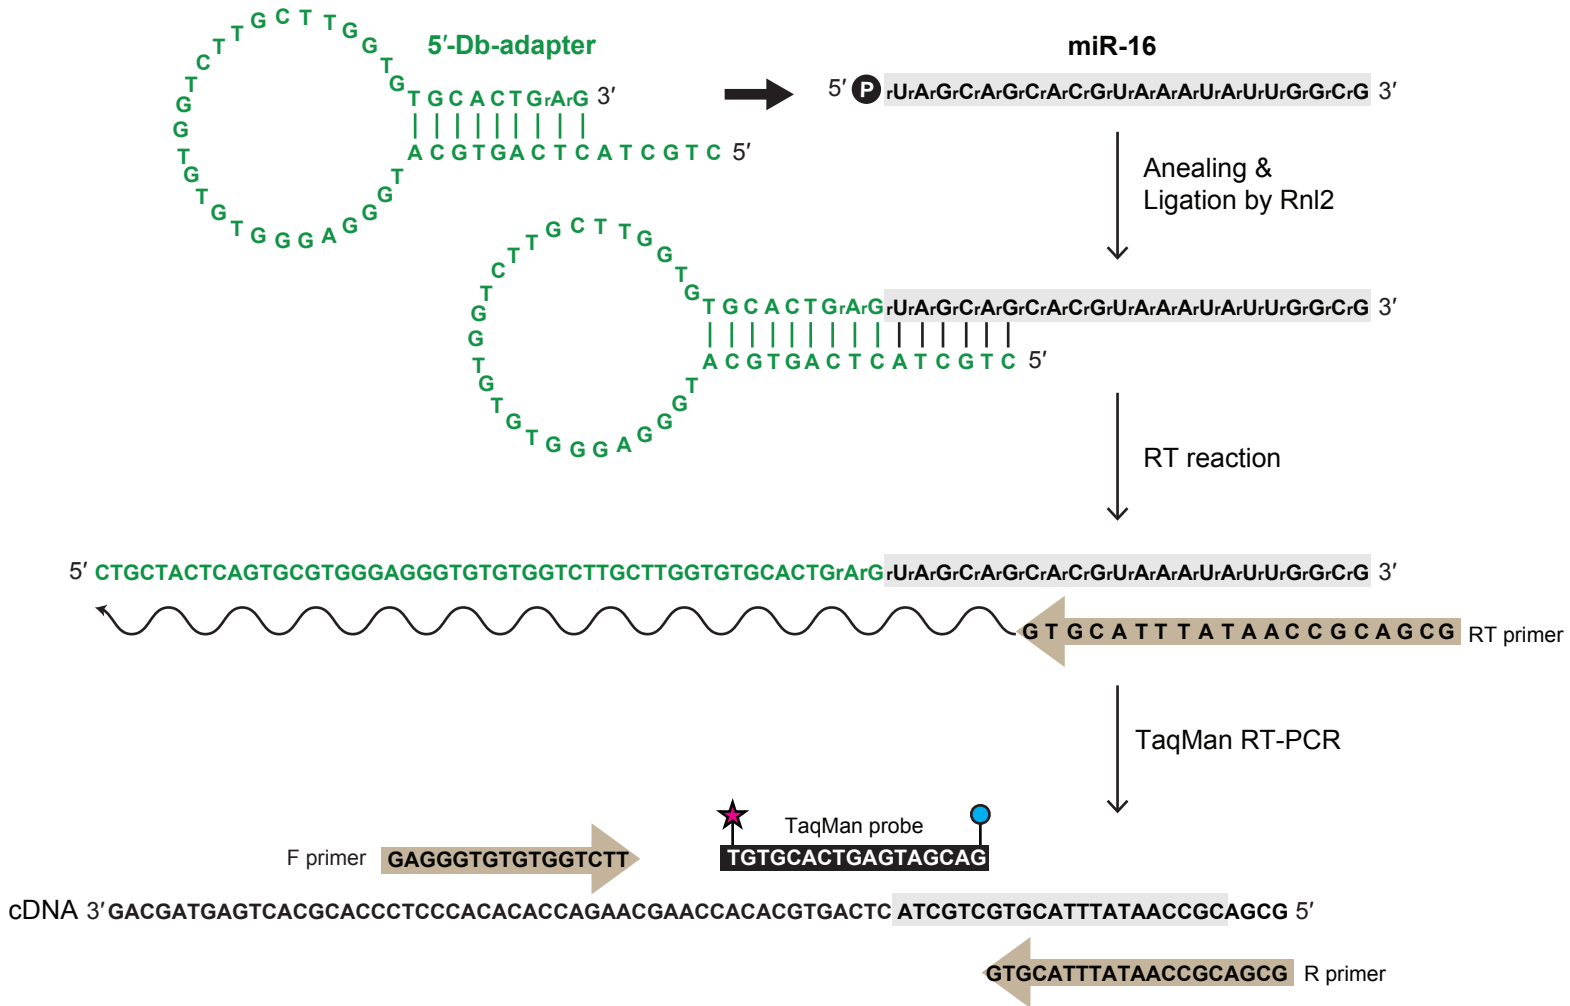

*Honda et al. Figure S6*

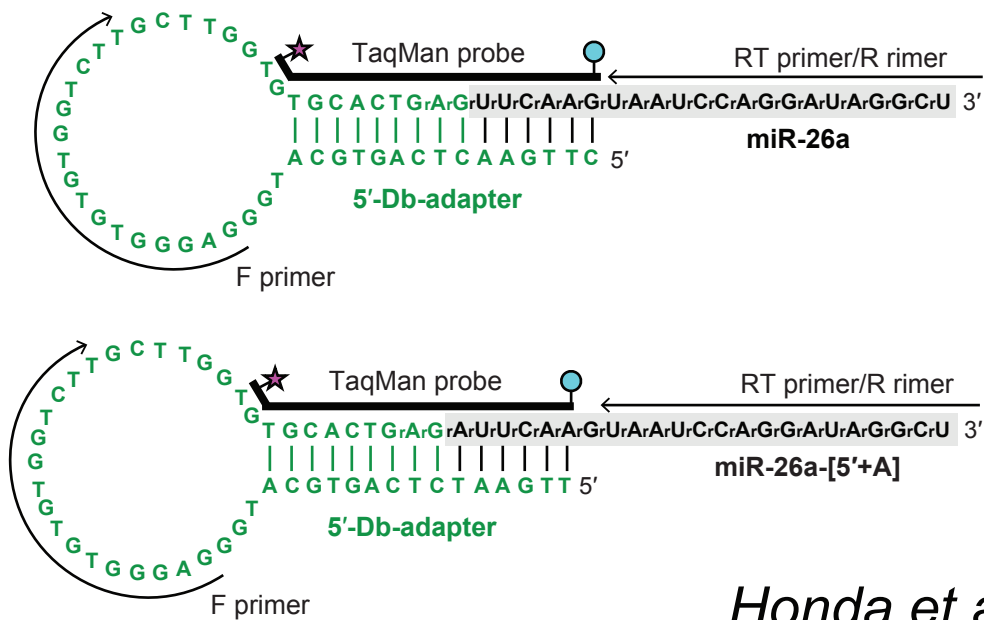

*Honda et al. Figure S7*

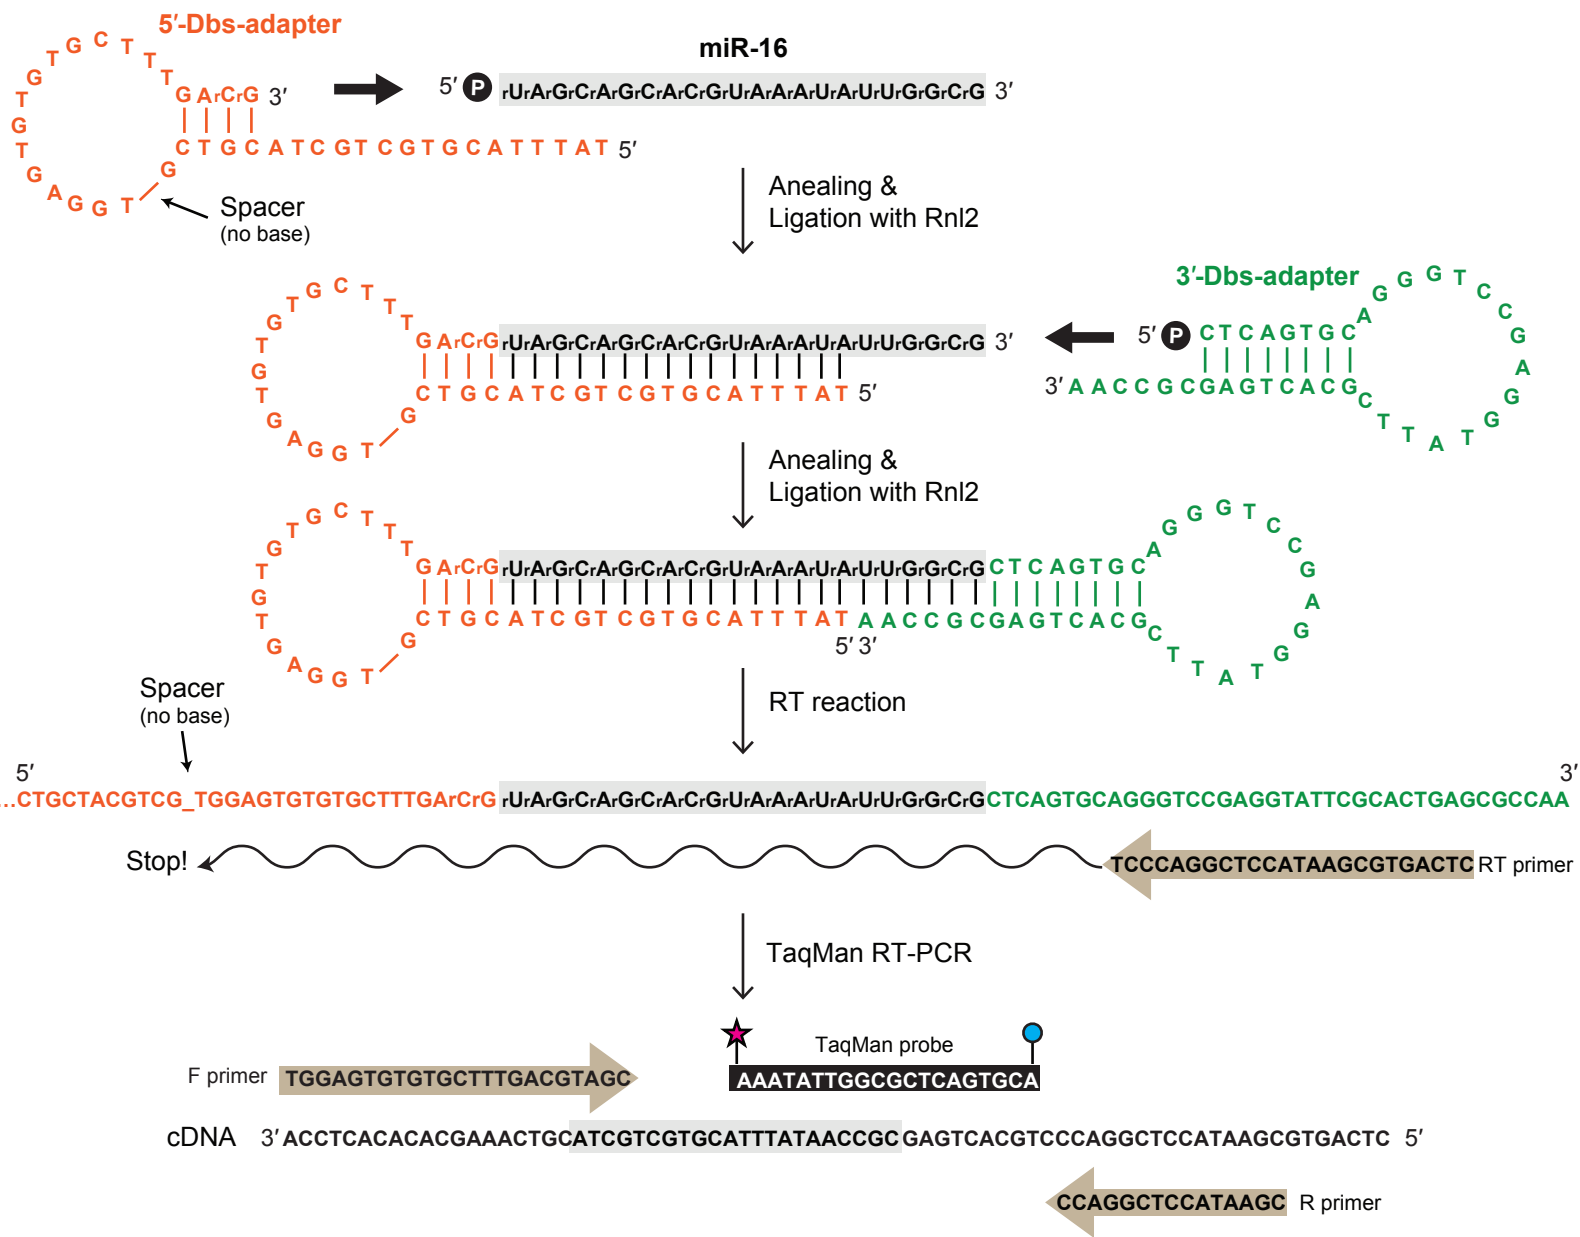

*Honda et al. Figure S8*

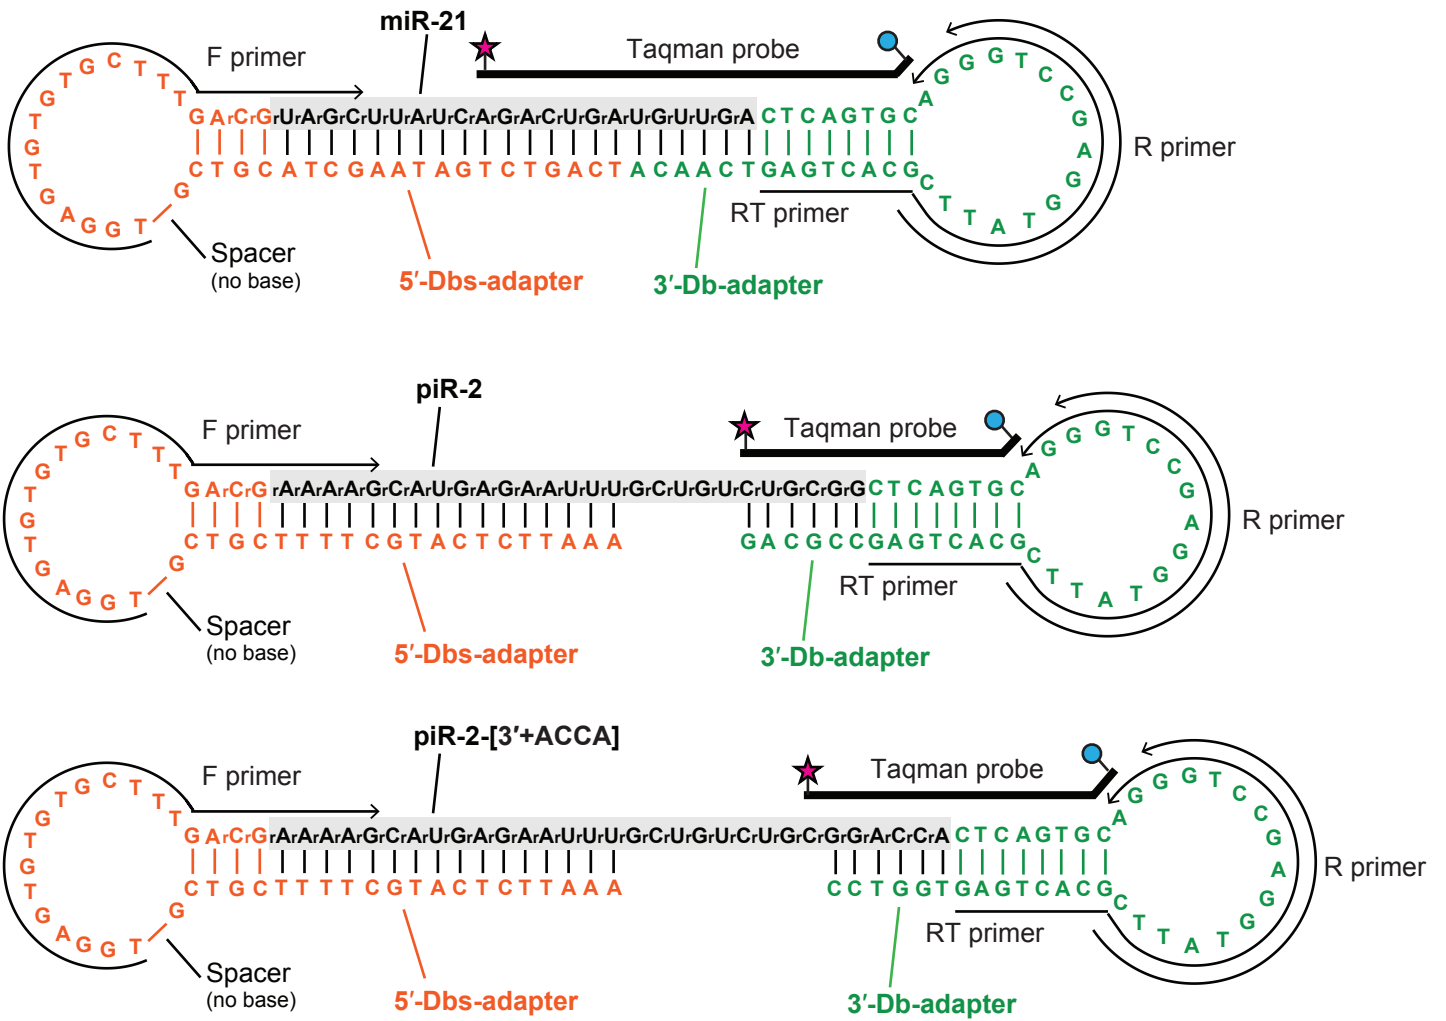

*Honda et al. Figure S9*
